# Supplementary material
Source: PubMed Central journal article supplement (PMC7772852)

Time lapse of PyMT single cell vs. cluster growth in 3D culture

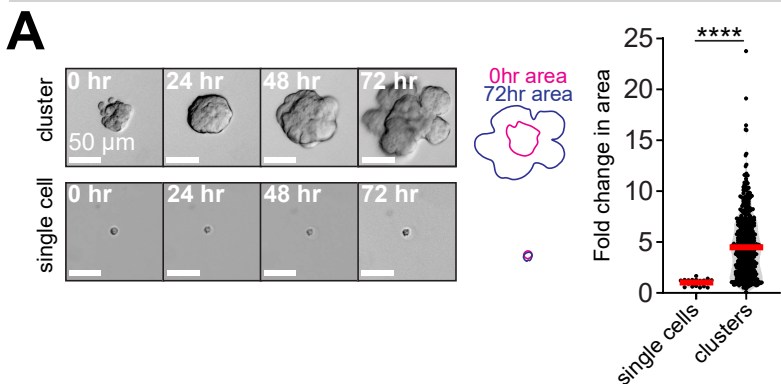

Proliferation depends on cluster size and # of directly contacting neighbor cells

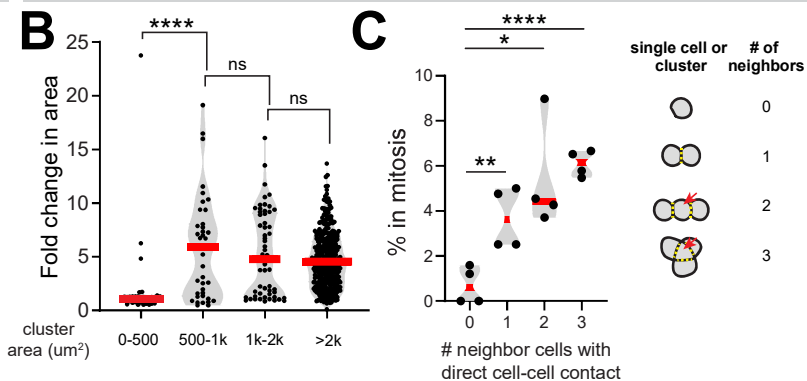

Time lapse of PyMT single cell vs. cluster apoptosis in 3D culture

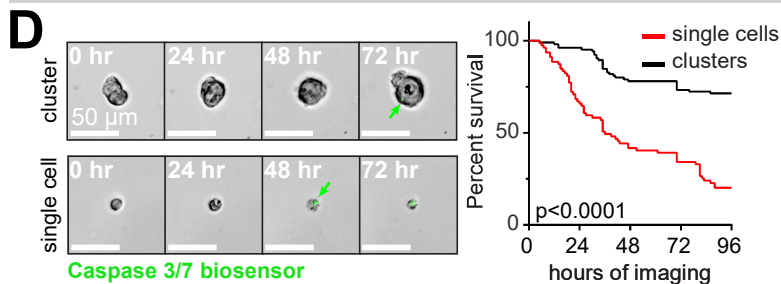

Time lapse of human breast cancer single cell vs. cluster apoptosis in 3D culture

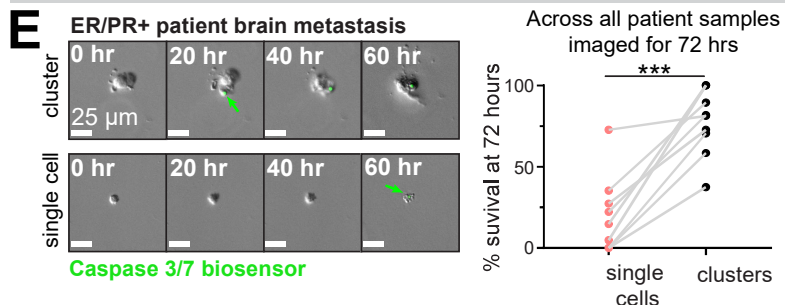

Apoptosis time lapse monitoring of single tumor cells or clusters from individual patients

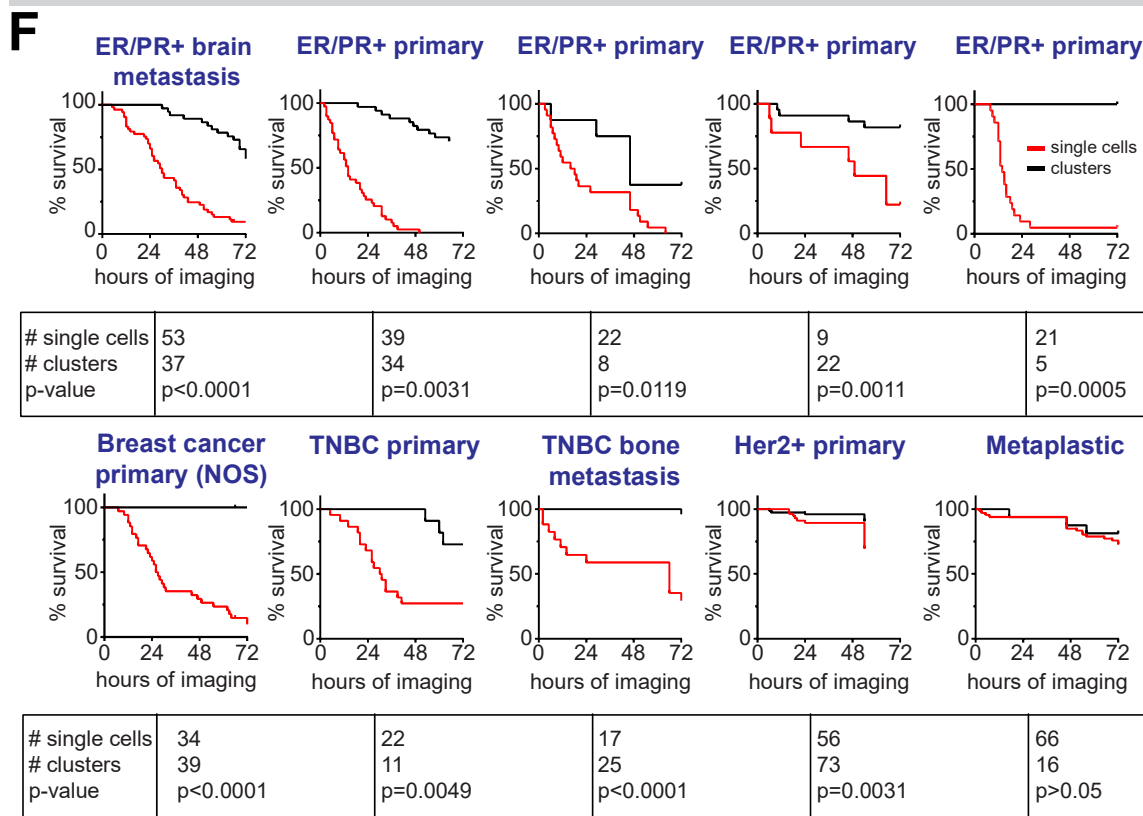

Supplement: NIHMS1654807-supplement-4.pdf [file NIHMS1654807-supplement-4.pdf]
