# Supplementary material
Source: PubMed Central journal article supplement (PMC7772852)

Receptor Tyrosine Kinase pTyrosine array of PyMT single cells vs. clusters

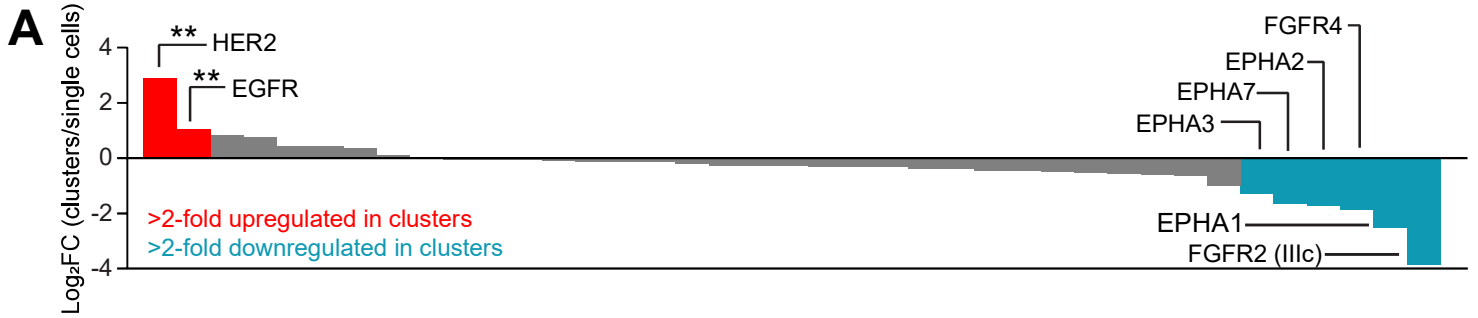

EGFR effector phosphorylation in PyMT single cells vs. clusters

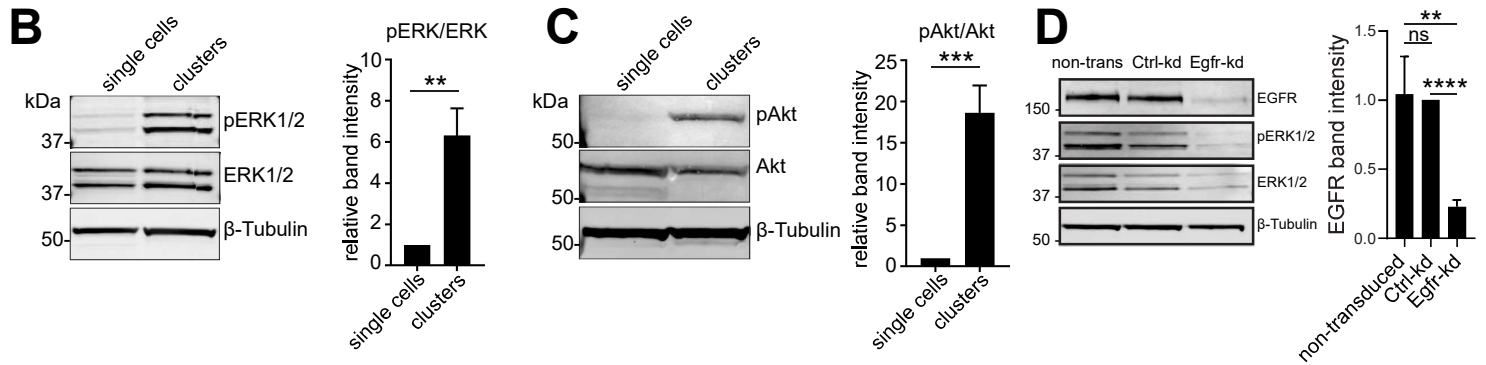

pEGFR and HER2 localization in PyMT clusters

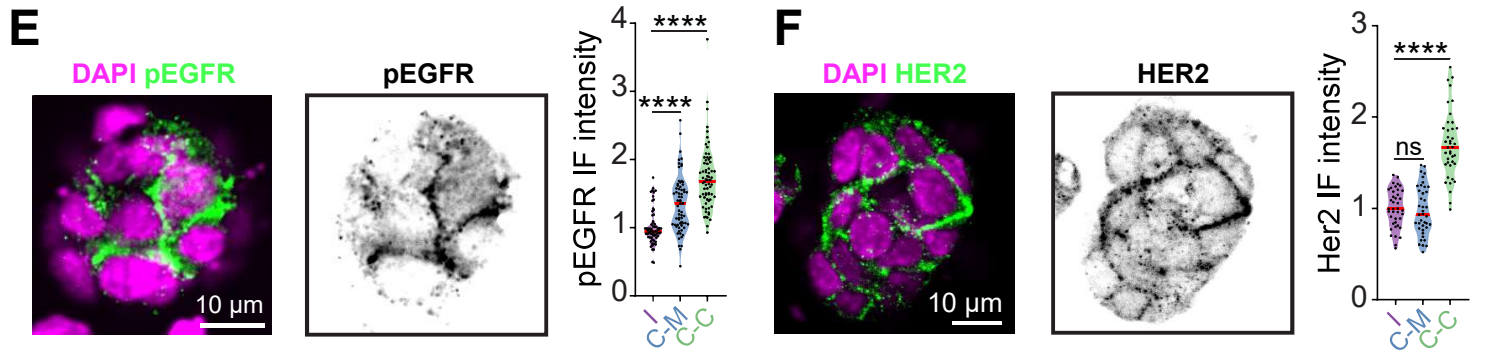

ImmunoEM of pEGFR and HER2 in nanolumina

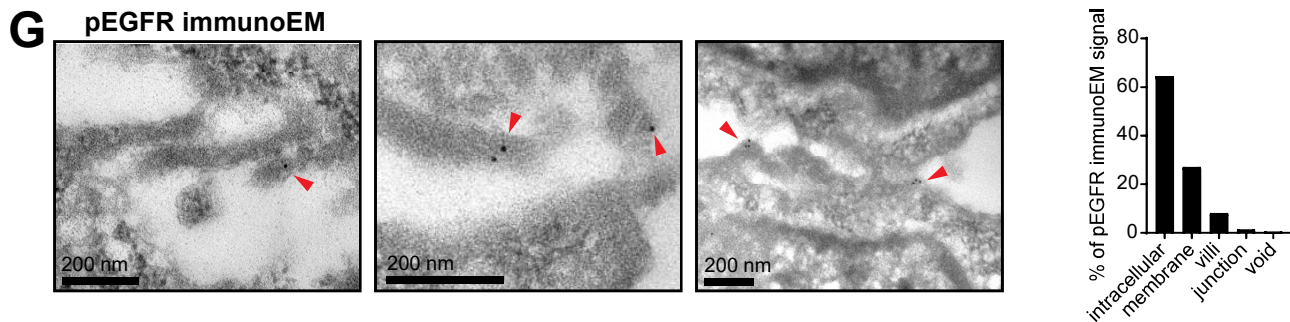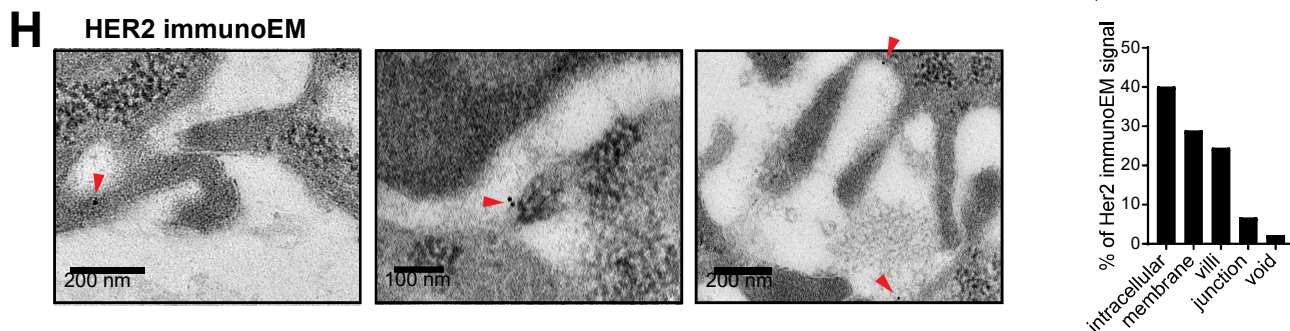

Supplement: NIHMS1654807-supplement-7.pdf [file NIHMS1654807-supplement-7.pdf]
