# Supplementary material
Source: PubMed Central journal article supplement (PMC7772852)

PEGFR and TEM of clusters from malignant ascites (Patient #2) Epigen in patient clusters

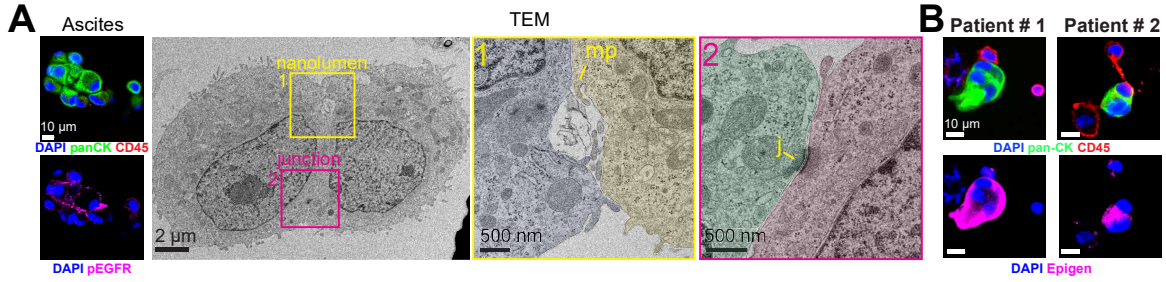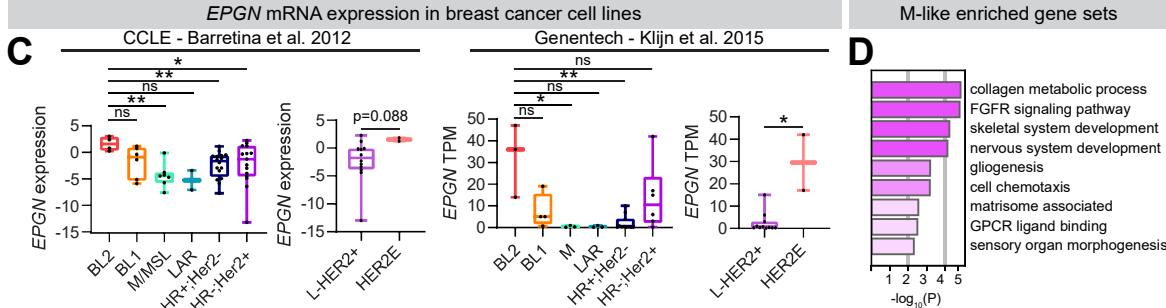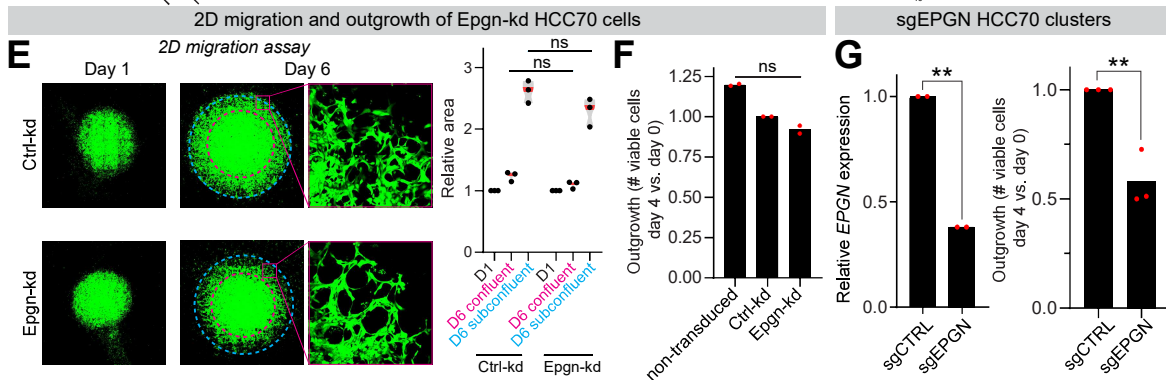

Effect of IFN $\gamma$  on HCC70 cluster cell death CDLN7 HCC70 vs. MDAMB231 Effect of IFN $\gamma$  on MDA-MB-231 clusters

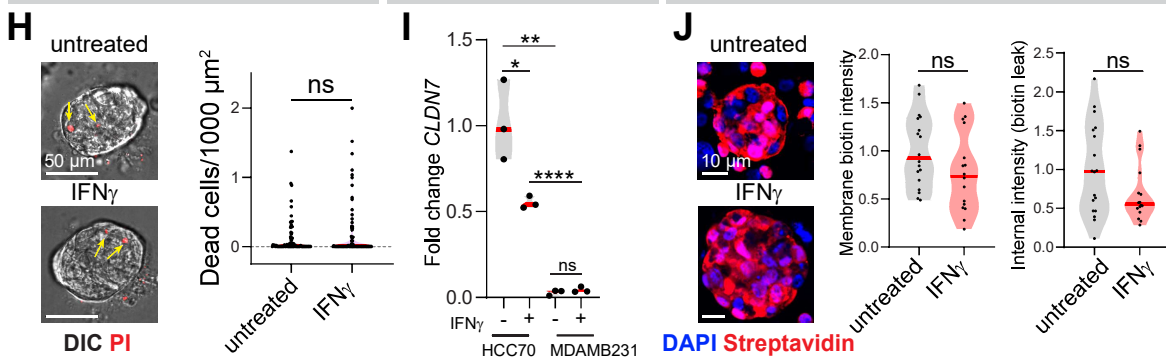

Intercellular nanolumina containing epigen promote collective metastatic outgrowth

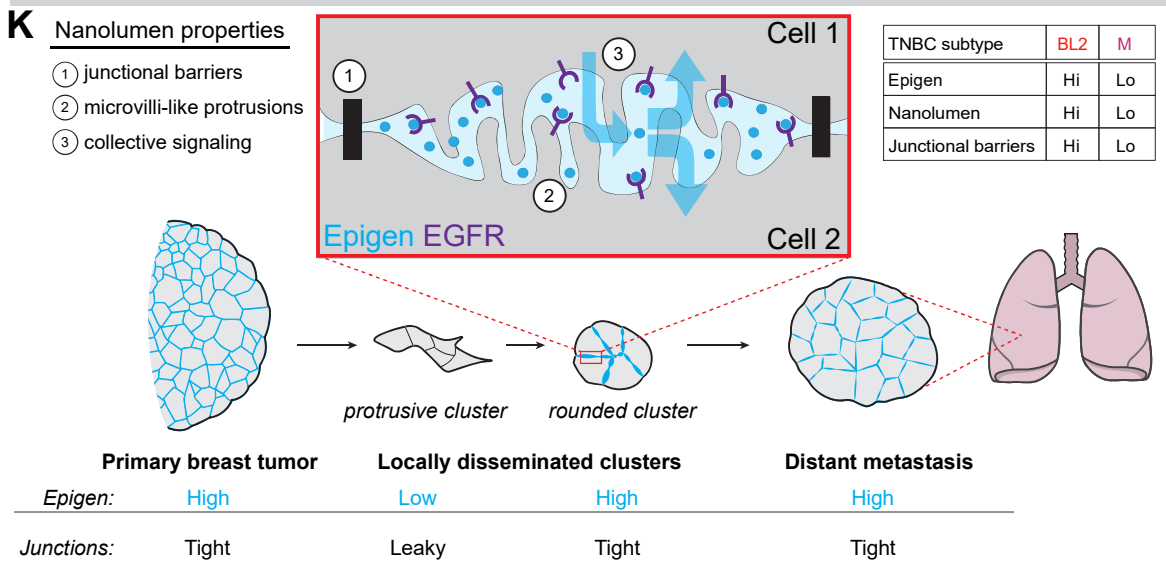

Supplement: NIHMS1654807-supplement-9.pdf [file NIHMS1654807-supplement-9.pdf]
