# Supplementary material
Source: PubMed Central journal article supplement (PMC7772852)

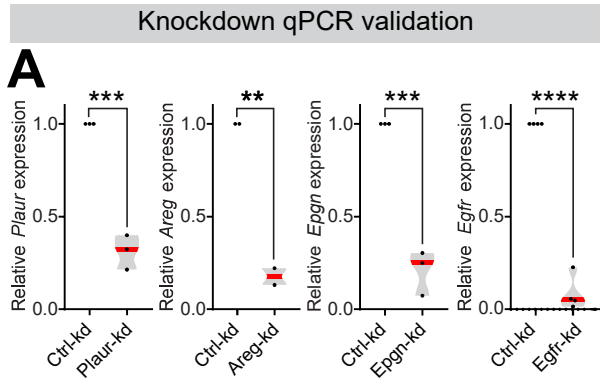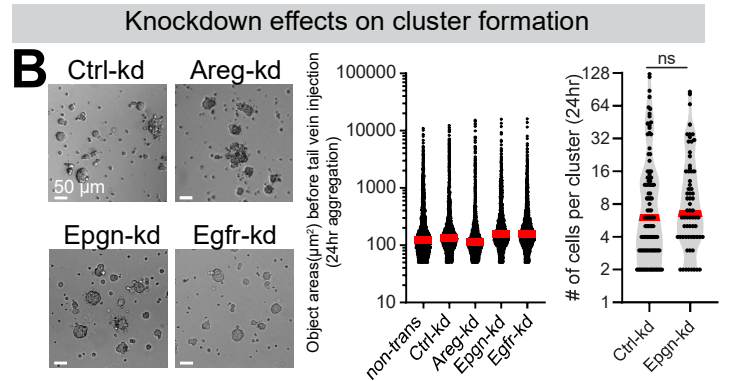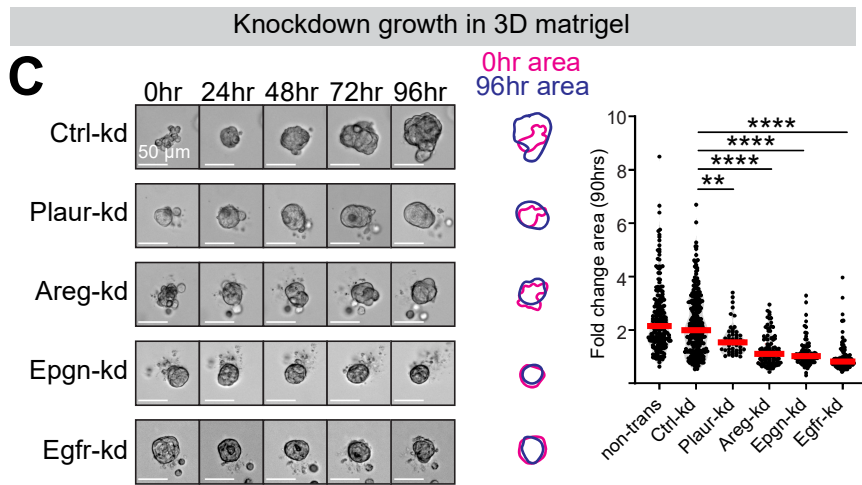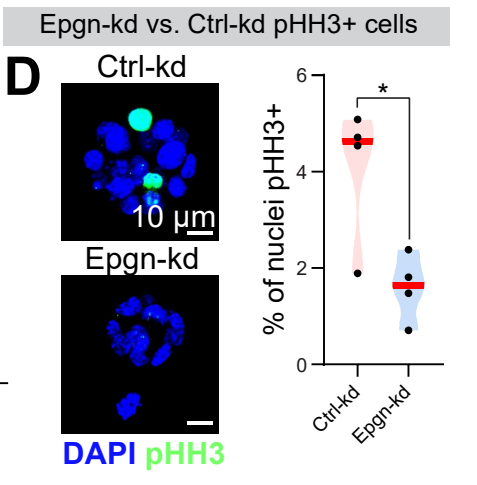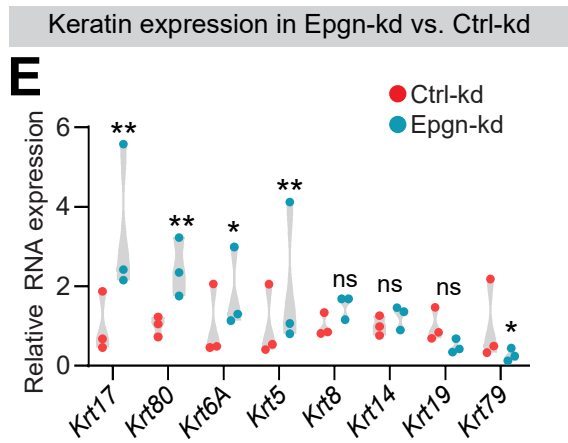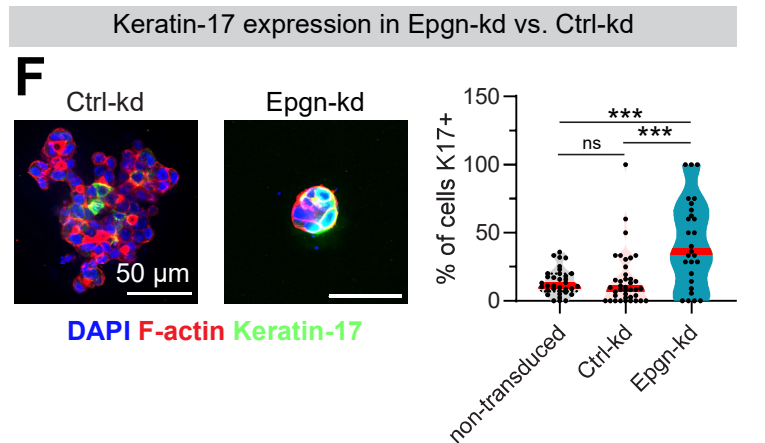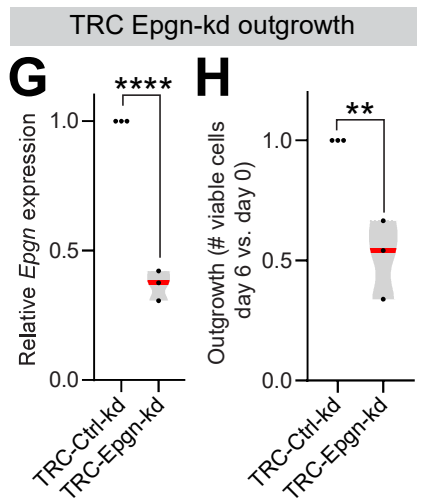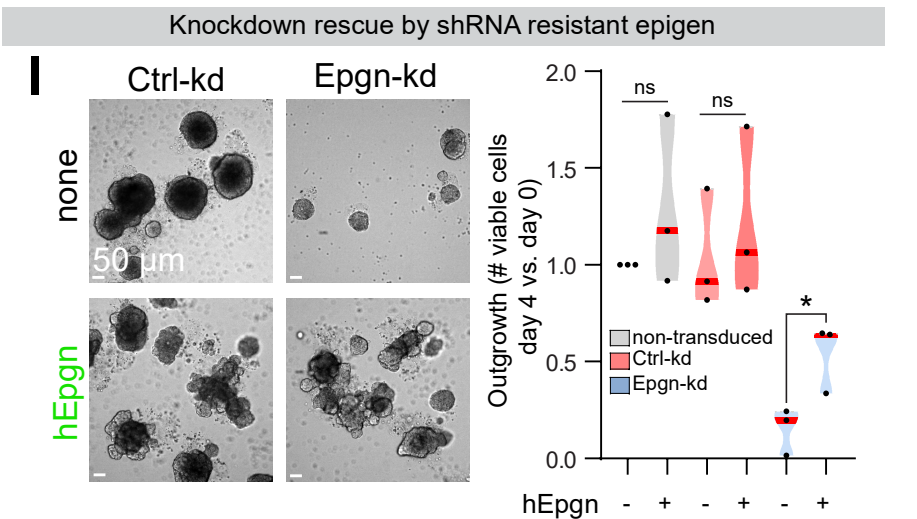

Supplement: NIHMS1654807-supplement-5.pdf [file NIHMS1654807-supplement-5.pdf]

Epigen localization in additional mouse models of breast cancer

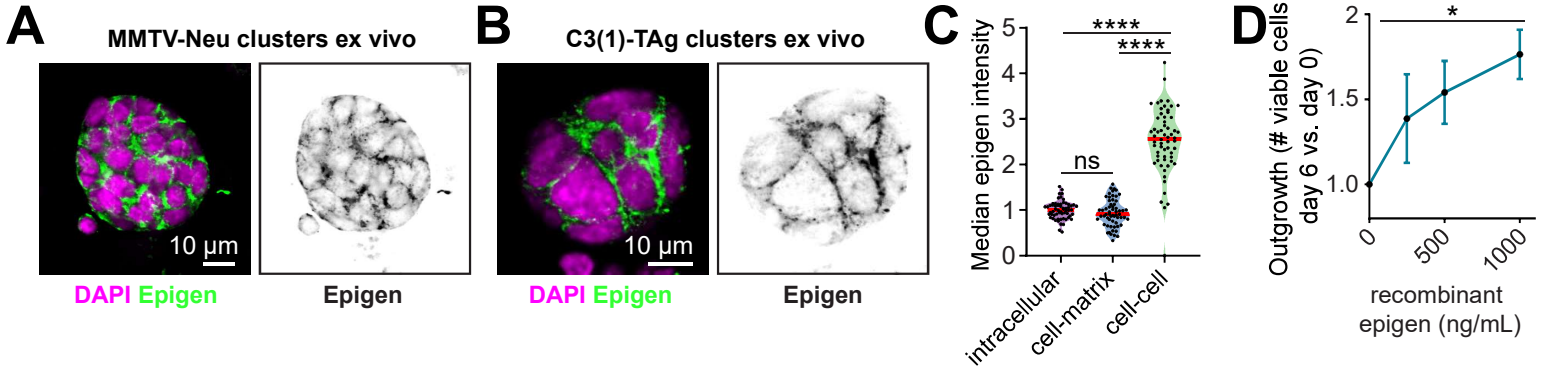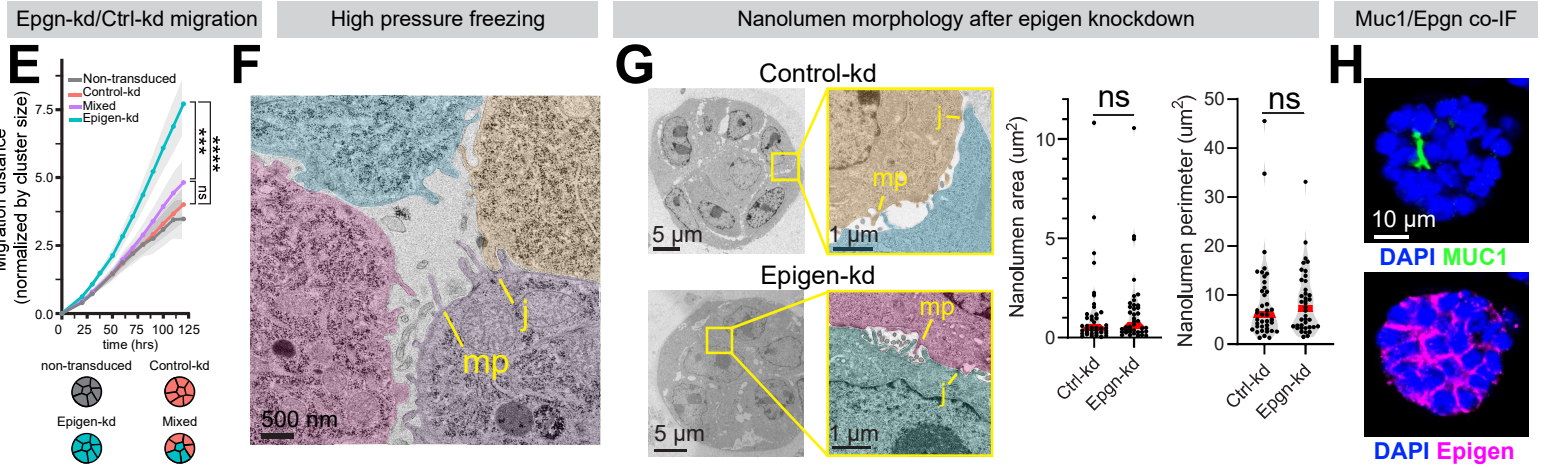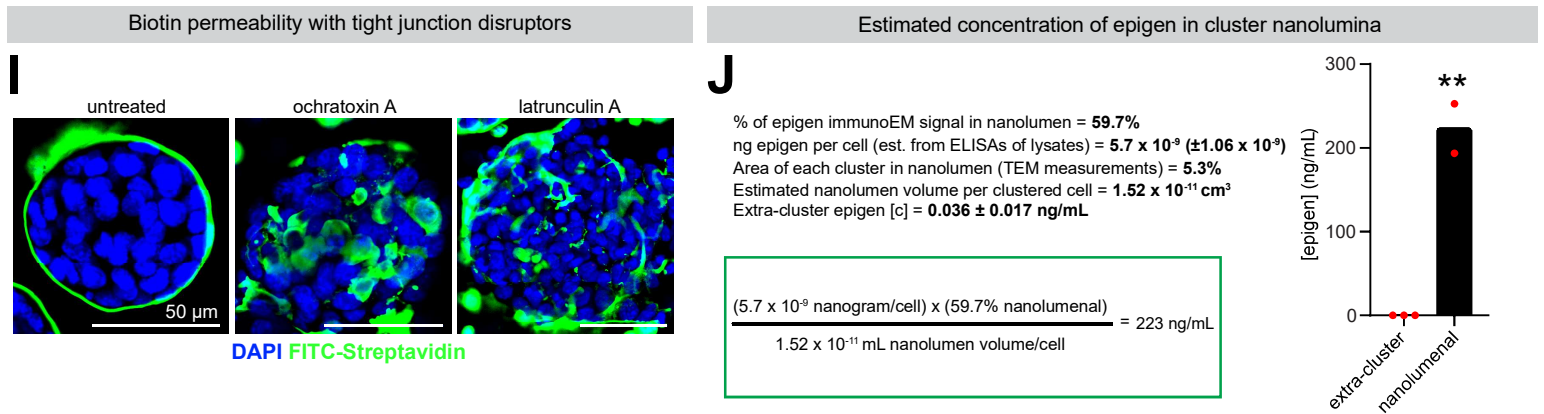

Supplement: NIHMS1654807-supplement-6.pdf [file NIHMS1654807-supplement-6.pdf]

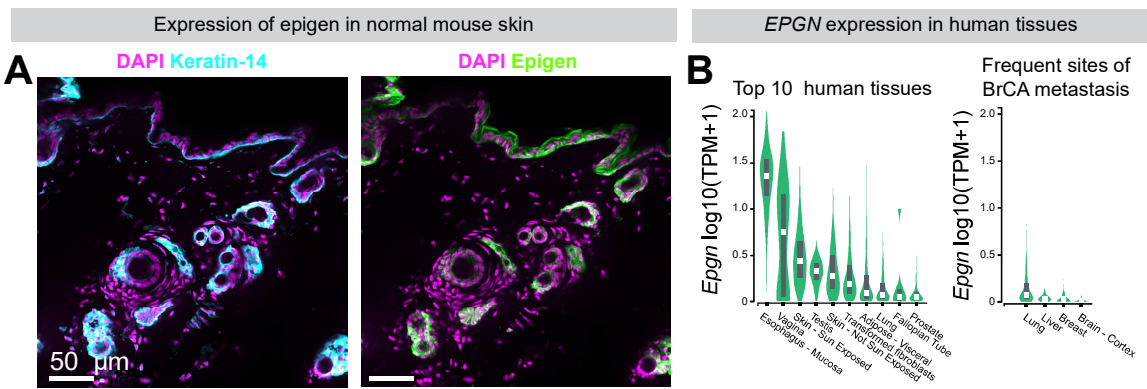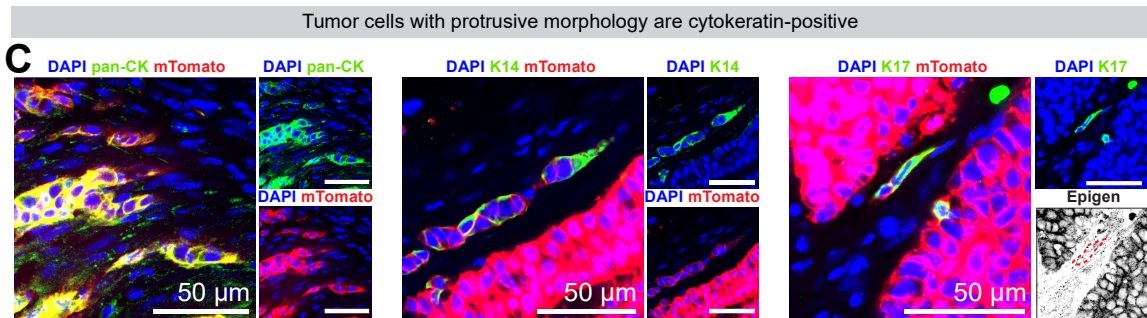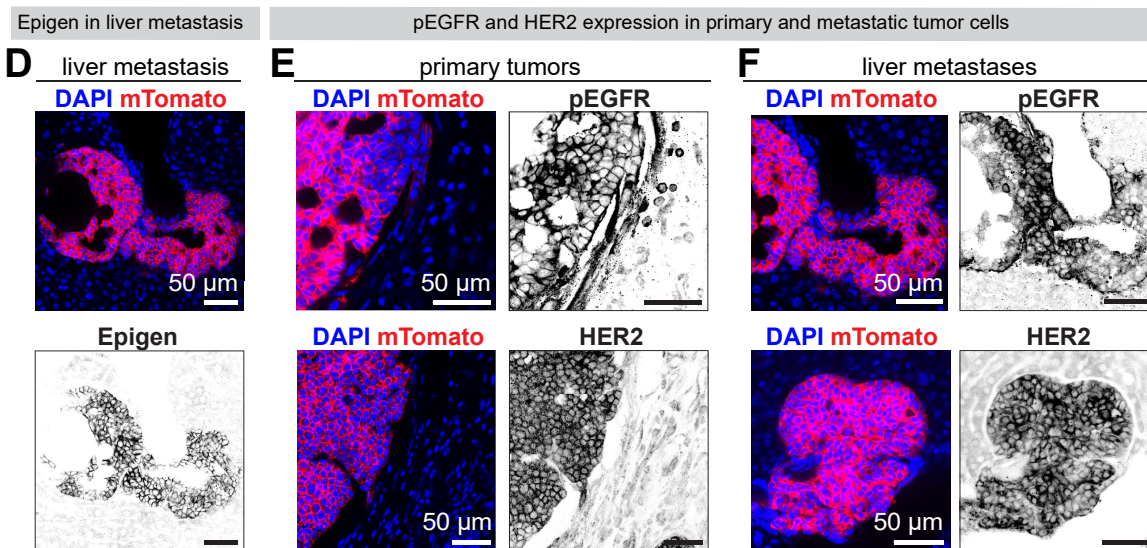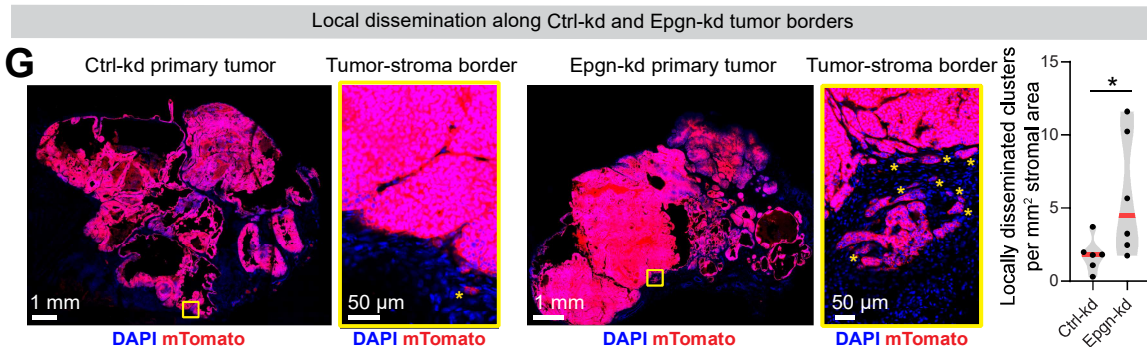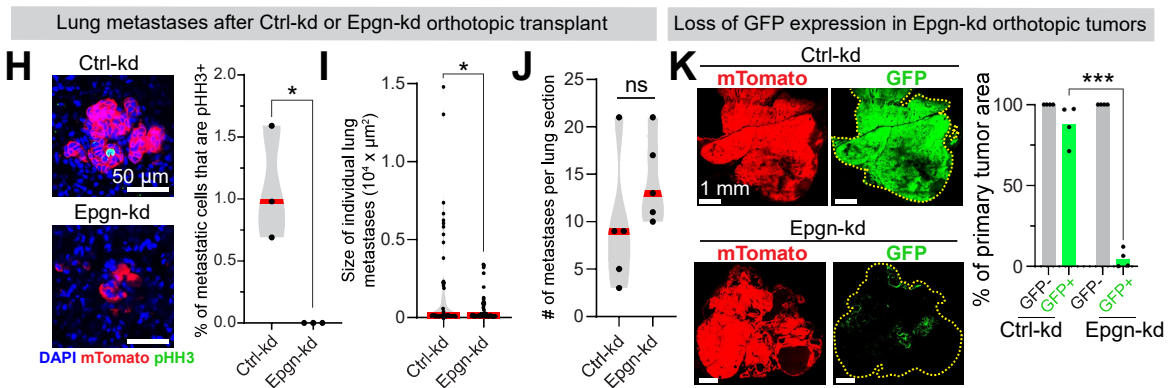

Supplement: NIHMS1654807-supplement-8.pdf [file NIHMS1654807-supplement-8.pdf]
